# Supplementary material for: An RNA polymerase II-associated TFIIF-like complex is indispensable for SL RNA gene transcription in Trypanosoma brucei
Source: PubMed Central journal article supplement — Nucleic Acids Res. 2017 Nov 25;46(4):1695–709. doi: 10.1093/nar/gkx1198 (PMC5829719; doi:10.1093/nar/gkx1198), 2017-11-25
Supplement: gkx1198_supp.pdf [file gkx1198_supp.pdf]

## **Srivastava *et al.* – Supplemental material**

- Table S1** List of oligonucleotides used in quantitative DNA/RNA analysis
- Figure S1** Reduced growth of TbR9PTPee culture
- Figure S2** 2<sup>nd</sup> RPB9-PTP purification
- Figure S3** Multiple sequence alignment of trypanosomatid TFL1 and TFL2 orthologs
- Figure S4** Surface electrostatic properties of the WH domains in TFL1, RAP30 and RAP74.
- Figure S5** Rat anti-TFL2 immune serum
- Figure S6** RNA pol II and TFL2 co-precipitate in a salt-sensitive manner
- Figure S7** Localization of TLF1-PTP and TLF2-PTP in procyclic trypanosomes
- Figure S8** Sequence conservation and homology model of the N-terminal domain of TSP2

## **Supplemental References**

Table S1. List of oligonucleotides used in quantitative DNA/RNA analysis

| Application                                               | Target                                       | Sequence                                                                |
|-----------------------------------------------------------|----------------------------------------------|-------------------------------------------------------------------------|
| RT-[q]PCR                                                 | <i>TFL1</i> mRNA                             | 5' -GATCATTCTGCCTCAGTGC-3'<br>5' -GATATTGCCATCCTCTGACG-3'               |
| RT-[q]PCR                                                 | <i>TFL2</i> mRNA                             | 5' -GATGGAAGGTCTGCTGTACC-3'<br>5' -CTCAACAGCCTCTTGTCTGG-3'              |
| RT-[q]PCR /<br>ChIP                                       | $\alpha$ tubulin coding region               | 5' -GTGCATTGAACGTGGATCTG-3'<br>5' -GCCTACCACGAGCAACTCTC-3'              |
| RT-[q]PCR /<br>ChIP qPCR                                  | <i>SLRNA</i> promoter                        | 5' -CTACCGACACATTTCTGGC-3'<br>5' -GGTATGAGAAGCTCCCAGTAGCAGC-3'          |
| RT-[q]PCR /<br>ChIP qPCR                                  | <i>SLRNA</i> intergenic region               | 5' -ATGGCTTATACGTGCTCGTTTCTCC-3'<br>5' -CACATATAGGCGCTTTAAAGTCTGCT-3'   |
| RT-[q]PCR /<br>ChIP qPCR                                  | <i>GPEET</i> procyclin promoter region       | 5' -TGATAGGTATCTCTTATTAGTATAG-3'<br>5' -GGGGTTATCGGGTGAGTAC-3'          |
| RT-[q]PCR<br>ChIP qPCR                                    | U2 snRNA                                     | 5' -ATATCTTCTCGGCTATTTAGC-3'<br>5' -ACAGGCAACAGTTTTGATCC-3'             |
| RT-[q]PCR<br>ChIP qPCR                                    | $\beta$ - $\alpha$ tubulin intergenic region | 5' -GCTGATTTCTGACAGATCTTCAAAC-3'<br>5' -GTGGATGCAGATAGCCTCACGCATG-3'    |
| Primer extension of<br><i>in vitro</i> transcribed<br>RNA | SL RNA<br>GPEET-trm RNA                      | SLtag 5' -GCCTGGCGCCATACCATGG-3'<br>Tag_PE 5' -GAGTGAATGATGATAGATTTG-3' |
| Primer extension of<br>total endogenous<br>RNA            | SL RNA<br>U2 snRNA                           | SL_PE 5' -CGACCCACCTTCCAGATTC-3'<br>U2f 5' -ACAGGCAACAGTTTTGATCC-3'     |

For each PCR primer pair, the forward primer is listed on top and the reverse primer on the bottom.

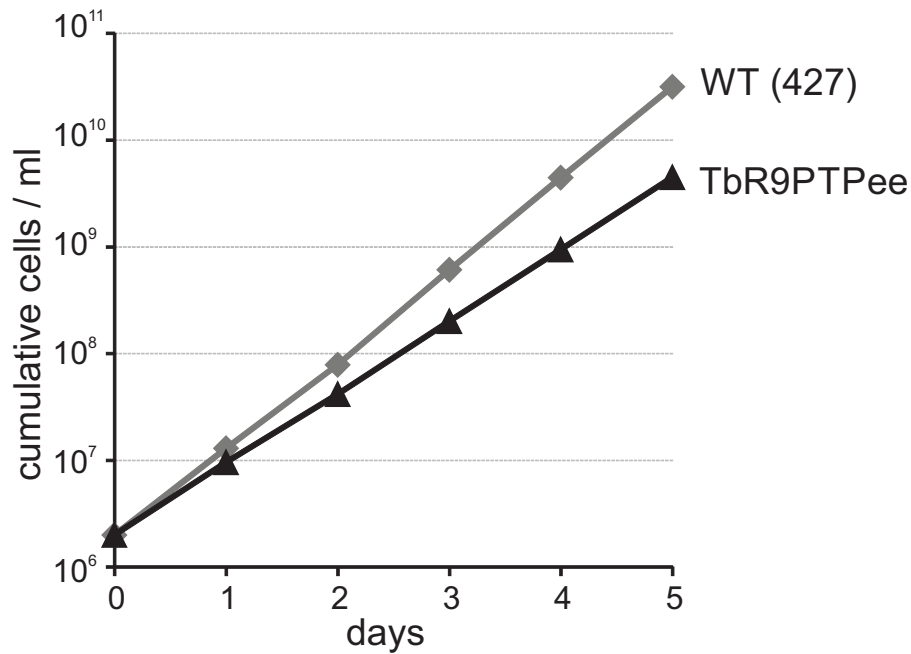

**Figure S1.** Reduced growth of TbR9PTPee culture. Cell densities of wild-type 427 procyclic trypanosomes (WT) and their derivative TbR9PTPee cells were determined and cultures diluted with medium to a density of  $2 \times 10^6$  cells daily. The doubling time of wild-type cells of 8.59 h was increased in TbR9PTPee cells to 10.78 h, suggesting that either the tag has a mild effect on RPB9 function or deleting one *RPB9* allele (see Figure 1A) resulted in haplo-insufficiency.

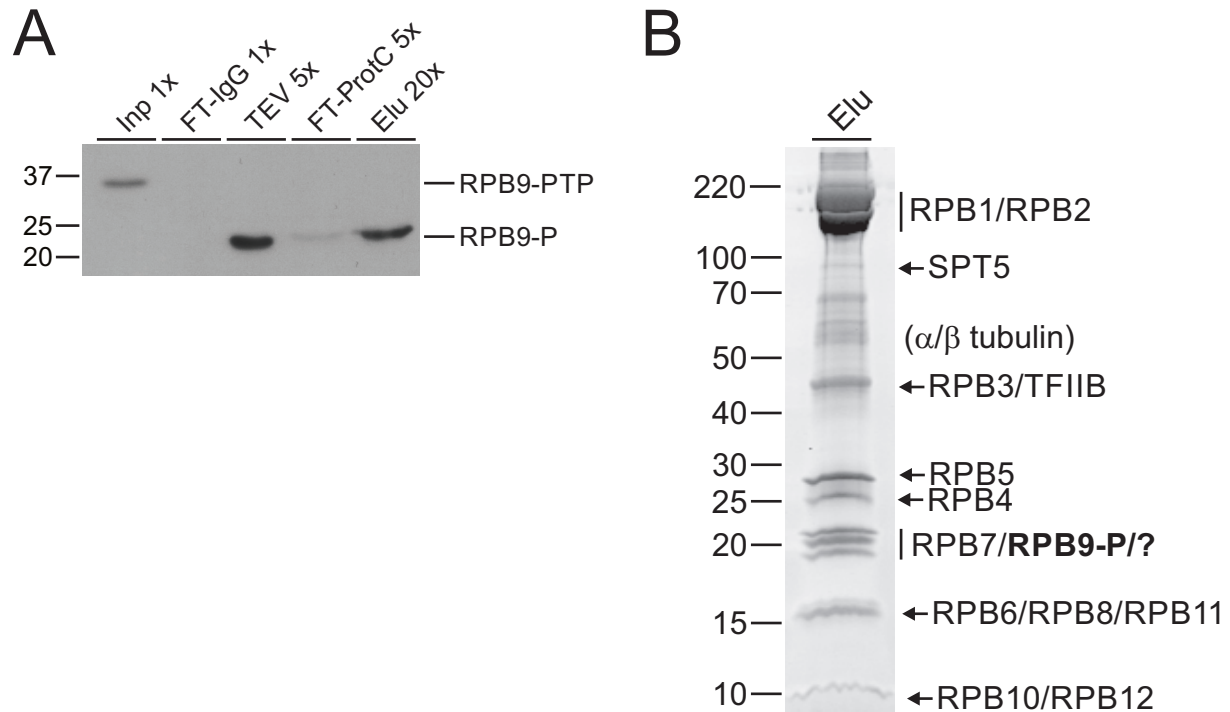

**Figure S2.** 2<sup>nd</sup> RPB9-PTP purification. RPB9-PTP was tandem affinity-purified from extract of TbR9PTPee cells. (A) Immunoblot analysis of PRP9-PTP and PRP9-P with anti-ProtC antibody in crude extract (Inp), flow-through of the IgG column (FT-IgG), TEV protease eluate (TEV), flow-through of the anti-ProtC immunoaffinity column (FT-ProtC), and the final eluate (Elu). x-Values indicate relative amounts loaded. (B) The final eluate (Elu) was separated on a SDS/10-20% polyacrylamide gradient gel and stained with Sypro Ruby. The gel lane was cut into several slices and analyzed by LC/MS/MS. Band annotation is according to the pattern analyzed in Figure 1C.





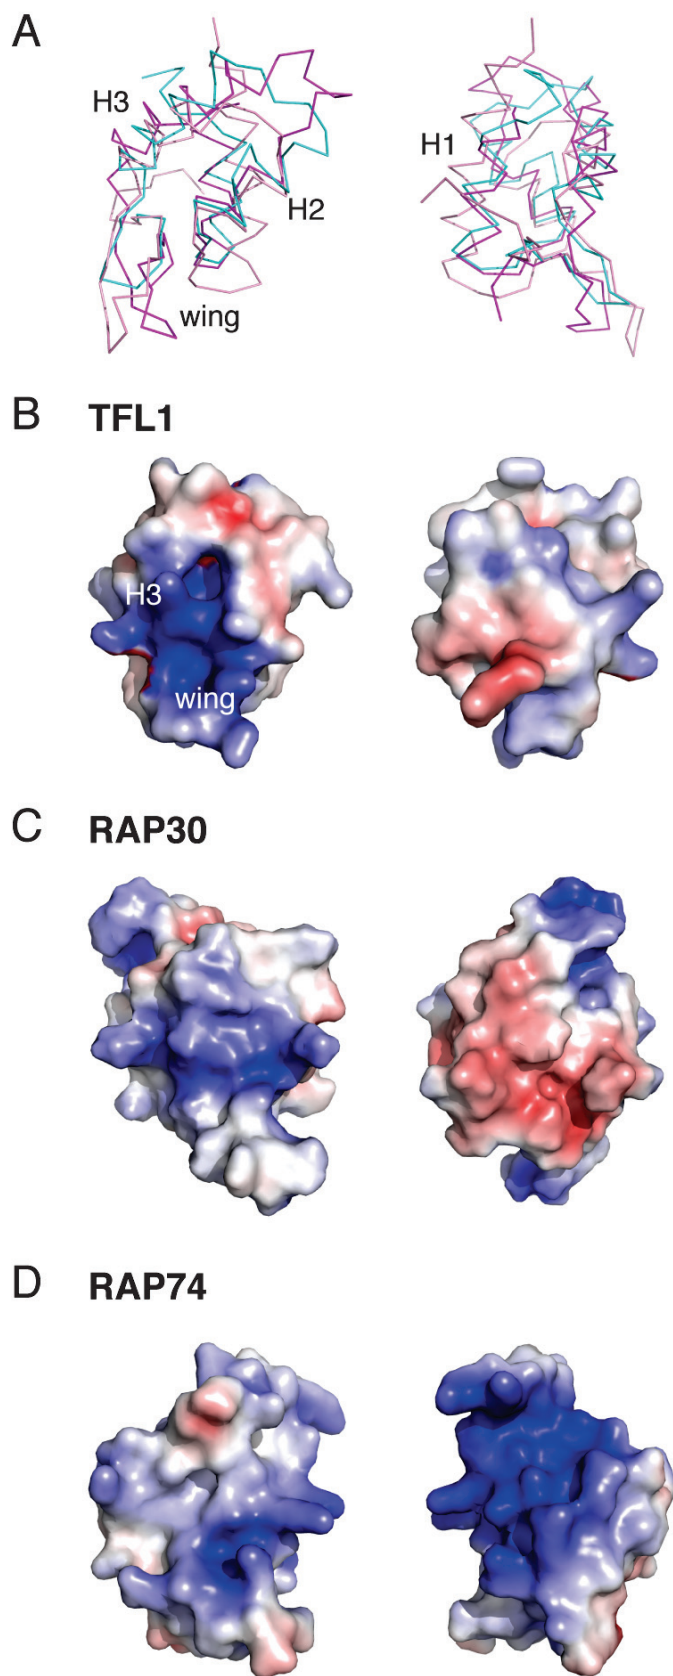

**Figure S4.** Surface electrostatic properties of the WH domains in TFL1, RAP30 and RAP74. **(A)**  $\alpha$ -carbon superposition of TFL1 (cyan) with RAP30 (pink) and RAP74 (magenta). **(B-D)** Molecular surface representation of the WH domains, colored according to the local electrostatic potential (positive, blue; negative, red), in an orientation similar to the one above. The left and right images are related by 180° rotations about the vertical.

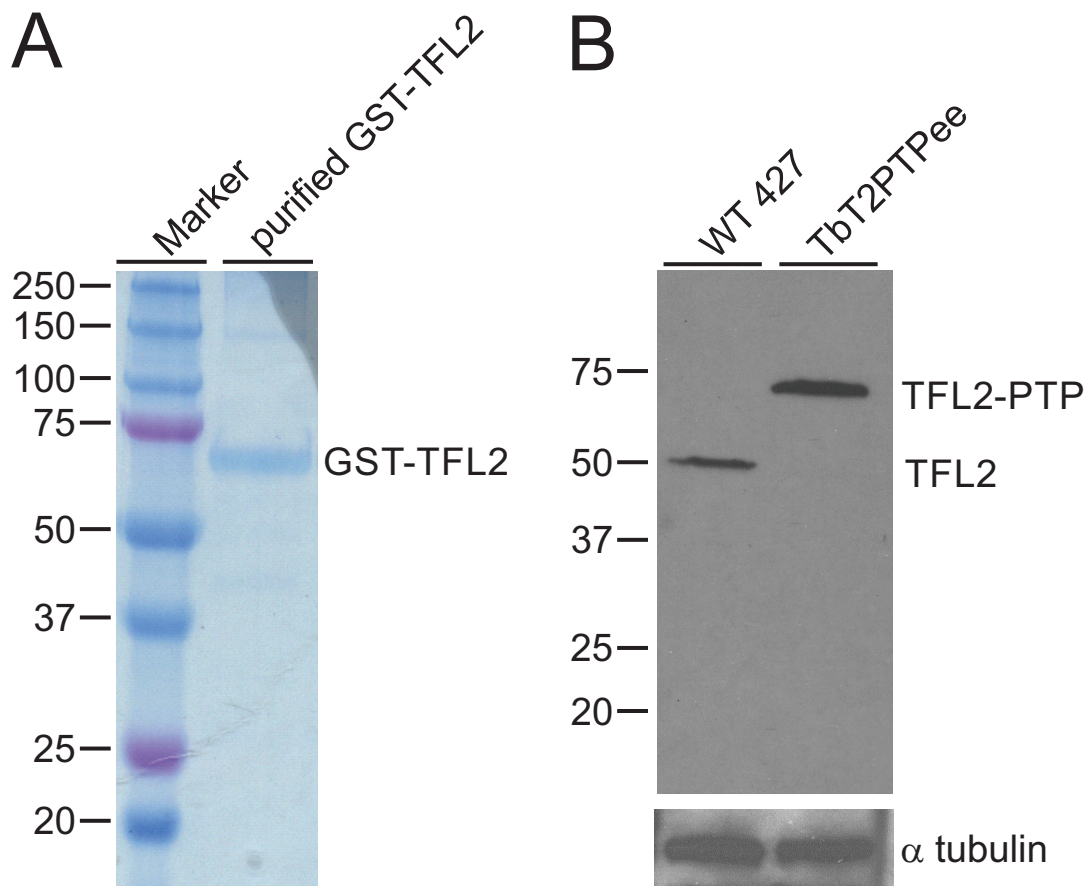

**Figure S5.** Rat anti-TFL2 immune serum. **(A)** The coding sequence of *Trypanosoma brucei brucei* strain 427 TLF2 was cloned into pGEX-6P-1 (GE Healthcare Life Sciences) downstream of the glutathione S-transferase (GST) coding sequence and transformed into the BL21 strain of *E. coli* (MilliporeSigma). The recombinant GST-TLF2 protein was purified by glutathione affinity chromatography using Glutathione Sepharose 4 Fast Flow beads (GE Healthcare Life Sciences) according to the manufacturer's specifications and by concentration of the eluate in an Amicon Ultracel-30 centrifugal filter (MilliporeSigma). **(B)** The purified protein was injected into the rat bloodstream, and immune serum was raised and obtained according to a published protocol (2). The immune serum was used to detect TLF2 in whole cell lysates of wild-type trypanosomes (WT 427) and in TbT2PTPee cells that exclusively express tagged TFL2-PTP and no untagged protein. As a loading control,  $\alpha$  tubulin was detected on the same blot.



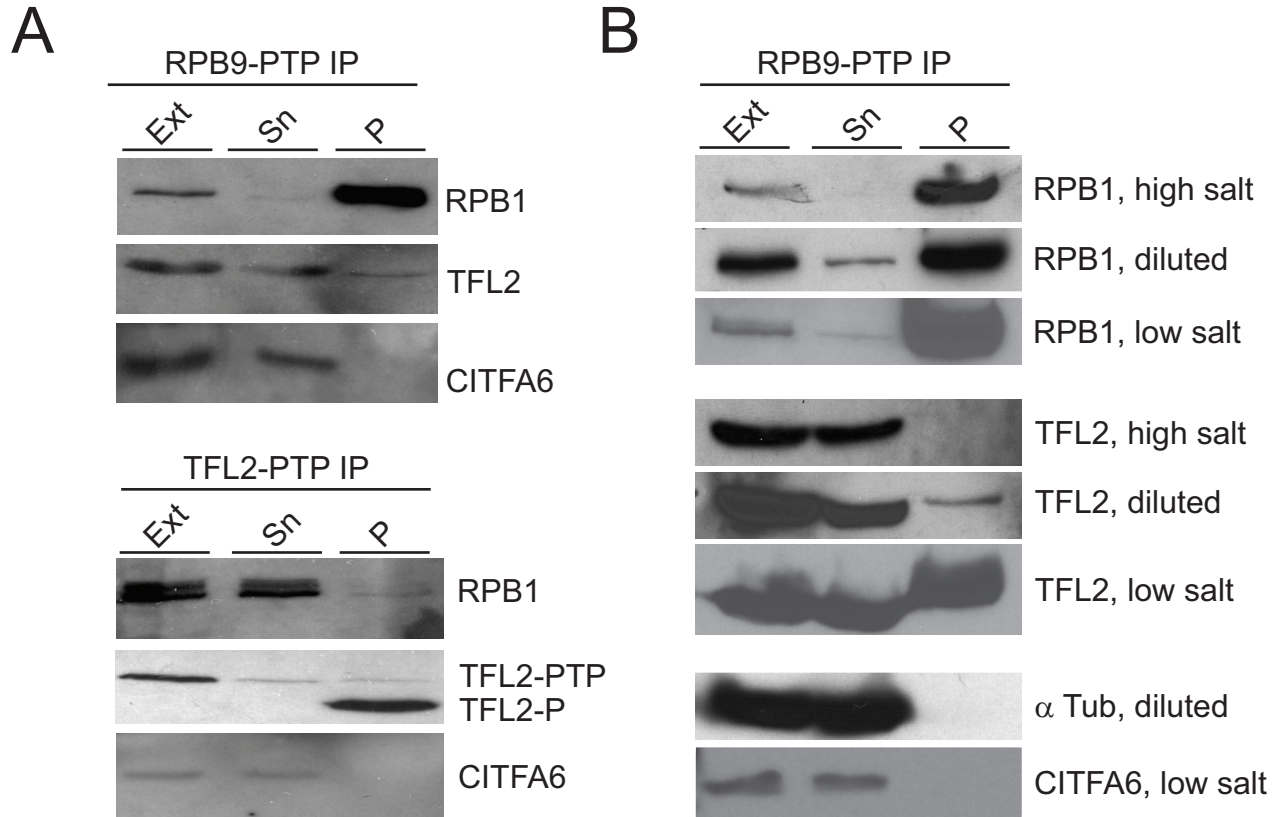

**Figure S6.** RNA pol II and TFL2 co-precipitate in a salt-sensitive manner. **(A)** From extract of TbR9PTPee cells and from extract of TbT2PTPee cells, RPB9-PTP and TFL2-PTP were precipitated with IgG beads, respectively. RNA pol II and TFL2 [co-]precipitation was analyzed by immunoblotting with rat-derived specific immune sera [(3,4); this study], detecting the largest RNA pol II subunit RPB1, tagged or untagged TFL2, and, as a negative control, the RNA pol I transcription factor subunit CITFA6 in extract (Ext), supernatant (Sn) and precipitate (P). Five times more precipitate was loaded relative to extract and supernatant. **(B)** The RPB9-PTP precipitation was repeated with undiluted extract (high salt, ~300 mM KCl), with extract that was diluted 1:1 with transcription buffer (150 mM sucrose, 20 mM HEPES-KOH, pH 7.7, 20 mM potassium L-glutamate, 3 mM MgCl<sub>2</sub>, 1 mM DTT, 10  $\mu$ g/ml aprotinin, 10  $\mu$ g/ml leupeptin) just prior to precipitation, and with extract that was generated by adding only 1/20 instead of 1/10 the volume of extraction buffer (150 sucrose, 20 mM HEPES-KOH, pH 7.7, 1500 mM KCl, 3 mM MgCl<sub>2</sub>) to broken cell suspension (low salt). In addition to CITFA6, the stronger expressed  $\alpha$  tubulin ( $\alpha$  Tub) was detected as a negative control. Tenfold more precipitate relative to extract and supernatant was loaded.

*The nearly undetectable and strong co-precipitation of TFL2 with RPB9-PTP in high and low-salt extracts, respectively, suggests that the RPB9-PTP/TLF complex was disrupted by high salt extraction and partially reformed upon diluting the extract with transcription buffer whereas it remained largely intact when only half the salt was used for extraction.*

**A**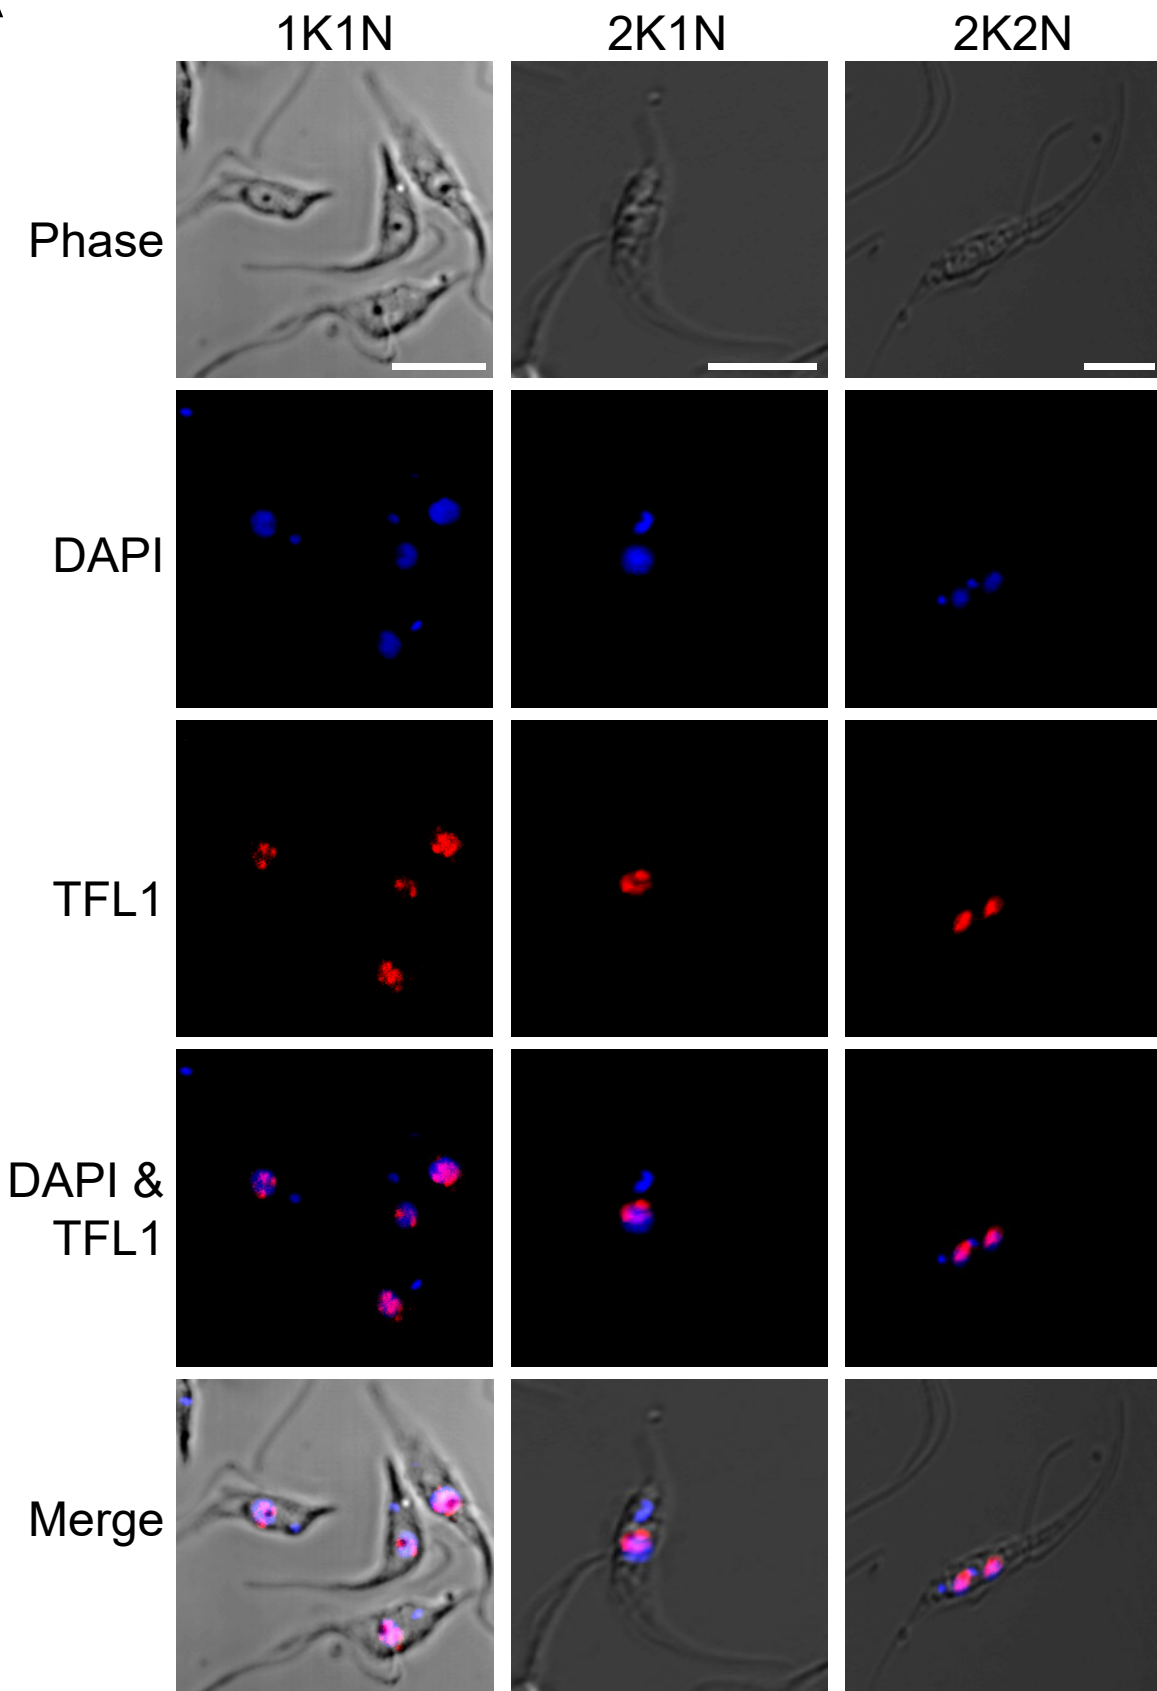

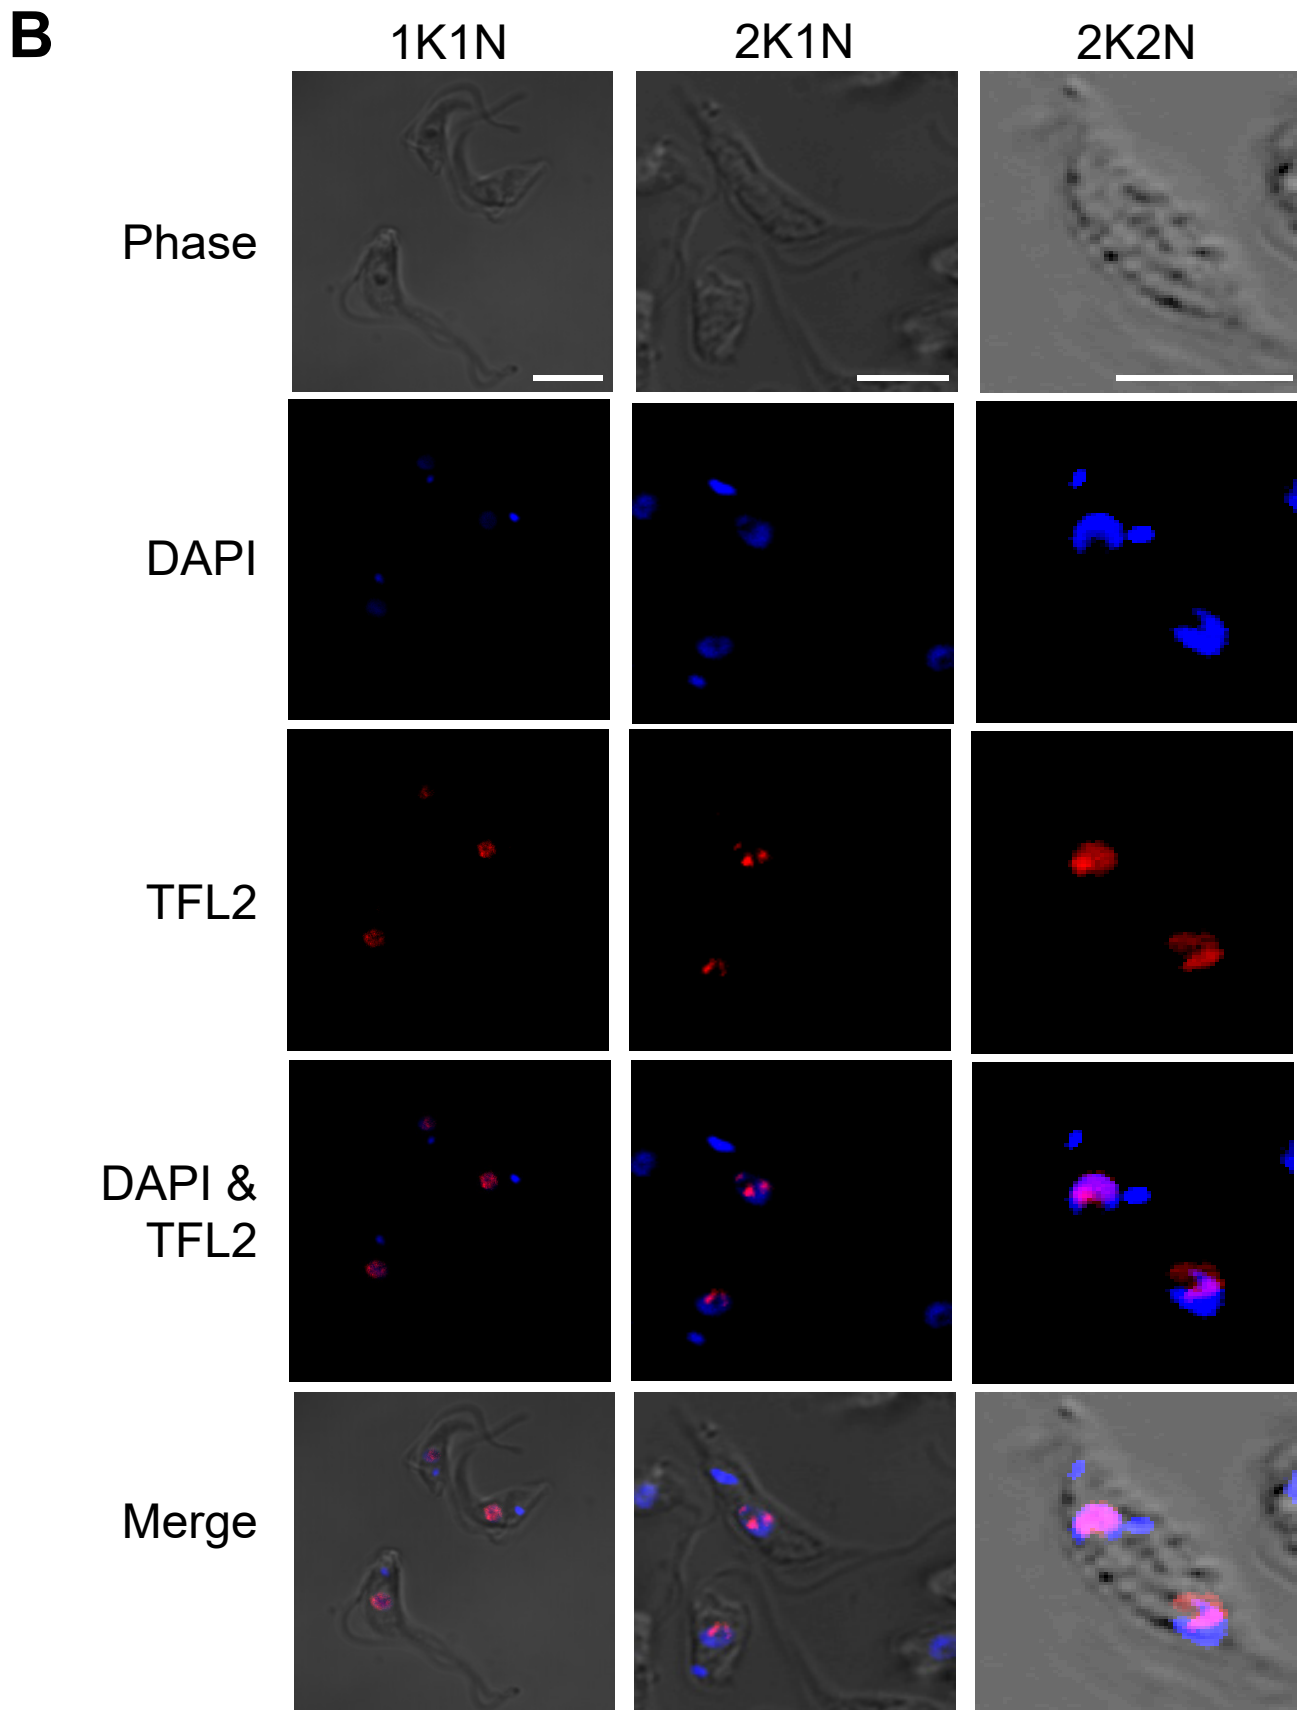

**Figure S7.** Localization of TLF1-PTP (A) and TLF2-PTP (B) in procyclic trypanosomes (red) which are in different cell cycle stages, having one nucleus and one kinetoplast (1K1N; G1 phase), 2K1N (late S phase) and 2K2N (postmitotic cells). DNA was stained with DAPI (blue) showing nuclei and smaller kinetoplasts. The nucleolus can be recognized within a nucleus as a spherical structure of low DNA density. White bars in top panels represent 5  $\mu$ m.

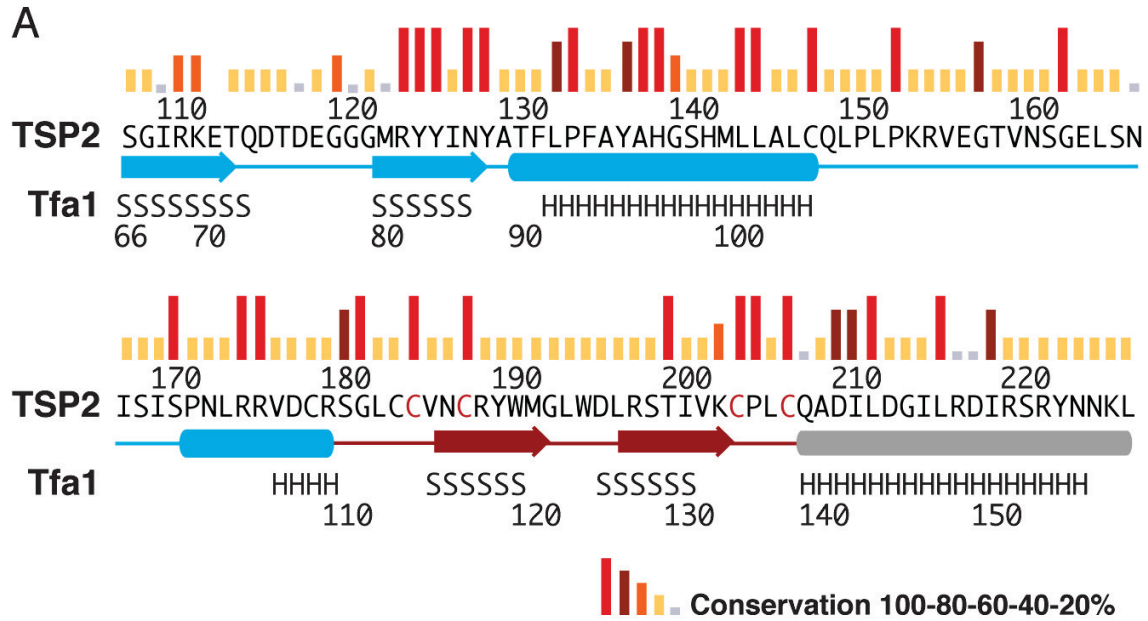

**B**

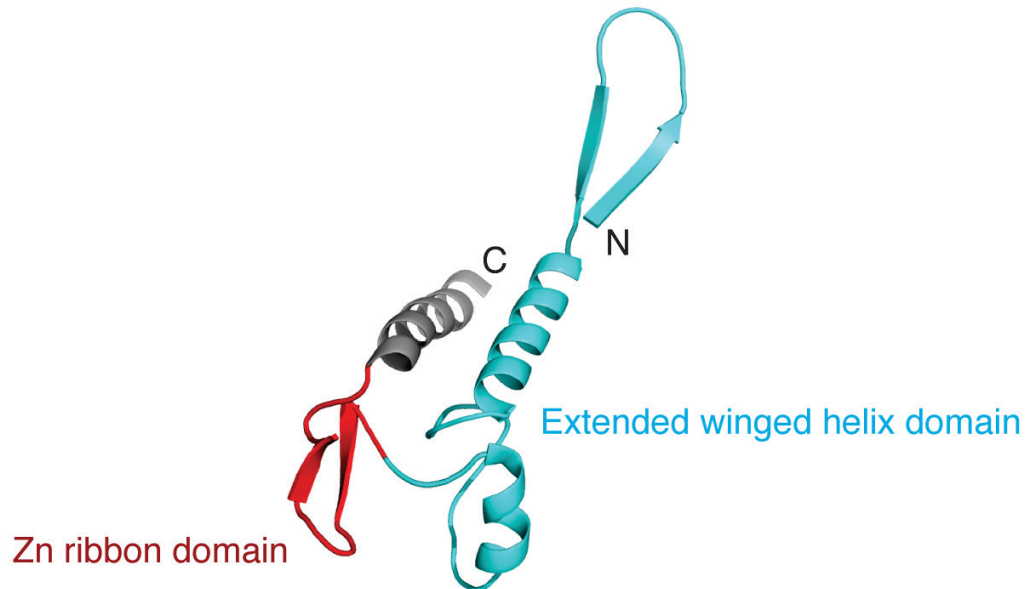

**Figure S8.** Sequence conservation and homology model of the N-terminal domain of TSP2. **(A)** Sequence conservation and predicted secondary-structure elements for the N-terminal domain of TSP2. Sequence conservation is shown as a bar graph, with red bars indicating identity among six trypanosomatid orthologs from *Trypanosoma brucei* (Tb927.11.14110), *Trypanosoma congolense* ([TcIL3000.11.14400](#)), *Trypanosoma cruzi* ([TcCLB.511727.150](#)), *Leishmania major* (LmjF32.0860), *Leishmania infantum* ([LinJ.32.0910](#)), and *Leishmania braziliensis* ([LbrM.32.0950](#)). Secondary-structure assignments predicted by PHYRE 2 are shown as cylinders ( $\alpha$  helices) and arrows ( $\beta$  strands). Secondary-structure assignments from the high-resolution cryo-EM structure of the N-terminal domain of Tfa1 (TFIIE $\alpha$ ) in a yeast initiation complex (PDB ID: 5FYW) are indicated by letters (“H”:  $\alpha$  helix; “S”:  $\beta$  strand). **(B)** Ribbon diagram of top scoring PHYRE homology model of the N-terminal domain of TSP2, with the extended winged helix domain colored in cyan and the zinc ribbon domain in red.

## Supplemental References

1. Sievers, F., Wilm, A., Dineen, D., Gibson, T.J., Karplus, K., Li, W., Lopez, R., McWilliam, H., Remmert, M., Soding, J. *et al.* (2011) Fast, scalable generation of high-quality protein multiple sequence alignments using Clustal Omega. *Mol. Syst. Biol.*, **7**, 539.
2. Schimanski, B., Brandenburg, J., Nguyen, T.N., Caimano, M.J. and Günzl, A. (2006) A TFIIIB-like protein is indispensable for spliced leader RNA gene transcription in *Trypanosoma brucei*. *Nucleic Acids Res.*, **34**, 1676-1684.
3. Badjatia, N., Ambrósio, D.L., Lee, J.H. and Günzl, A. (2013) Trypanosome cdc2-related kinase 9 controls spliced leader RNA cap4 methylation and phosphorylation of RNA polymerase II subunit RPB1. *Mol. Cell. Biol.*, **33**, 1965-1975.
4. Nguyen, T.N., Nguyen, B.N., Lee, J.H., Panigrahi, A.K. and Günzl, A. (2012) Characterization of a novel class I transcription factor A (CITFA) subunit that is indispensable for transcription by the multifunctional RNA polymerase I of *Trypanosoma brucei*. *Eukaryot. Cell*, **11**, 1573-1581.
